# Supplementary material
Source: PubMed Central journal article supplement (PMC2771549)
Supplement: NIHMS64216-supplement-2.pdf [file NIHMS64216-supplement-2.pdf]

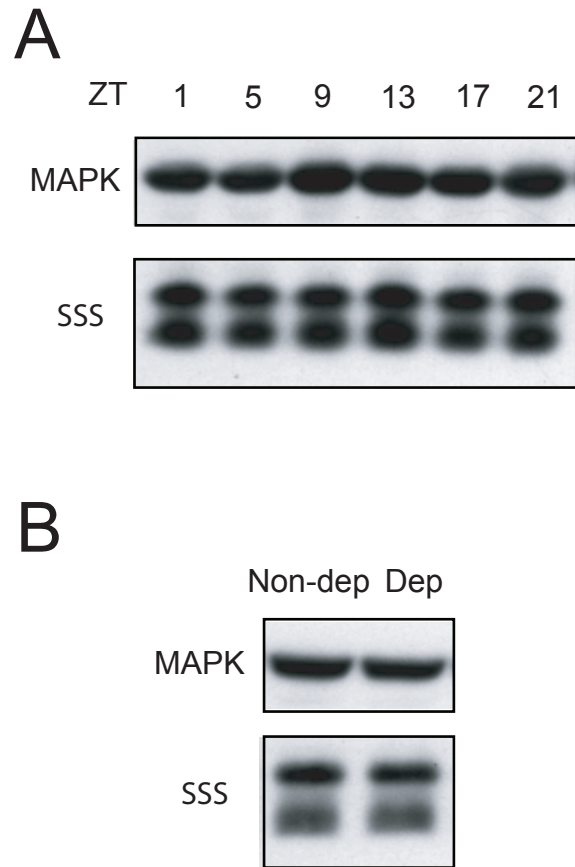

**fig. S1.** Regulation of SSS protein. **(A)** Circadian profile of SSS protein in head extracts. Wild-type fly heads were collected at indicated Zeitgeber times (ZT), and SSS levels were determined by Western blot analysis. **(B)** SSS protein levels in head extracts do not change in response to sleep deprivation. The SSS protein level of wild-type (*iso31*) flies that were deprived of sleep for 8 hours during ZT 12-20 (Dep) is comparable to that of wild-type flies that were not deprived (Non-dep). Each of these experiments was performed 3 times with similar results.

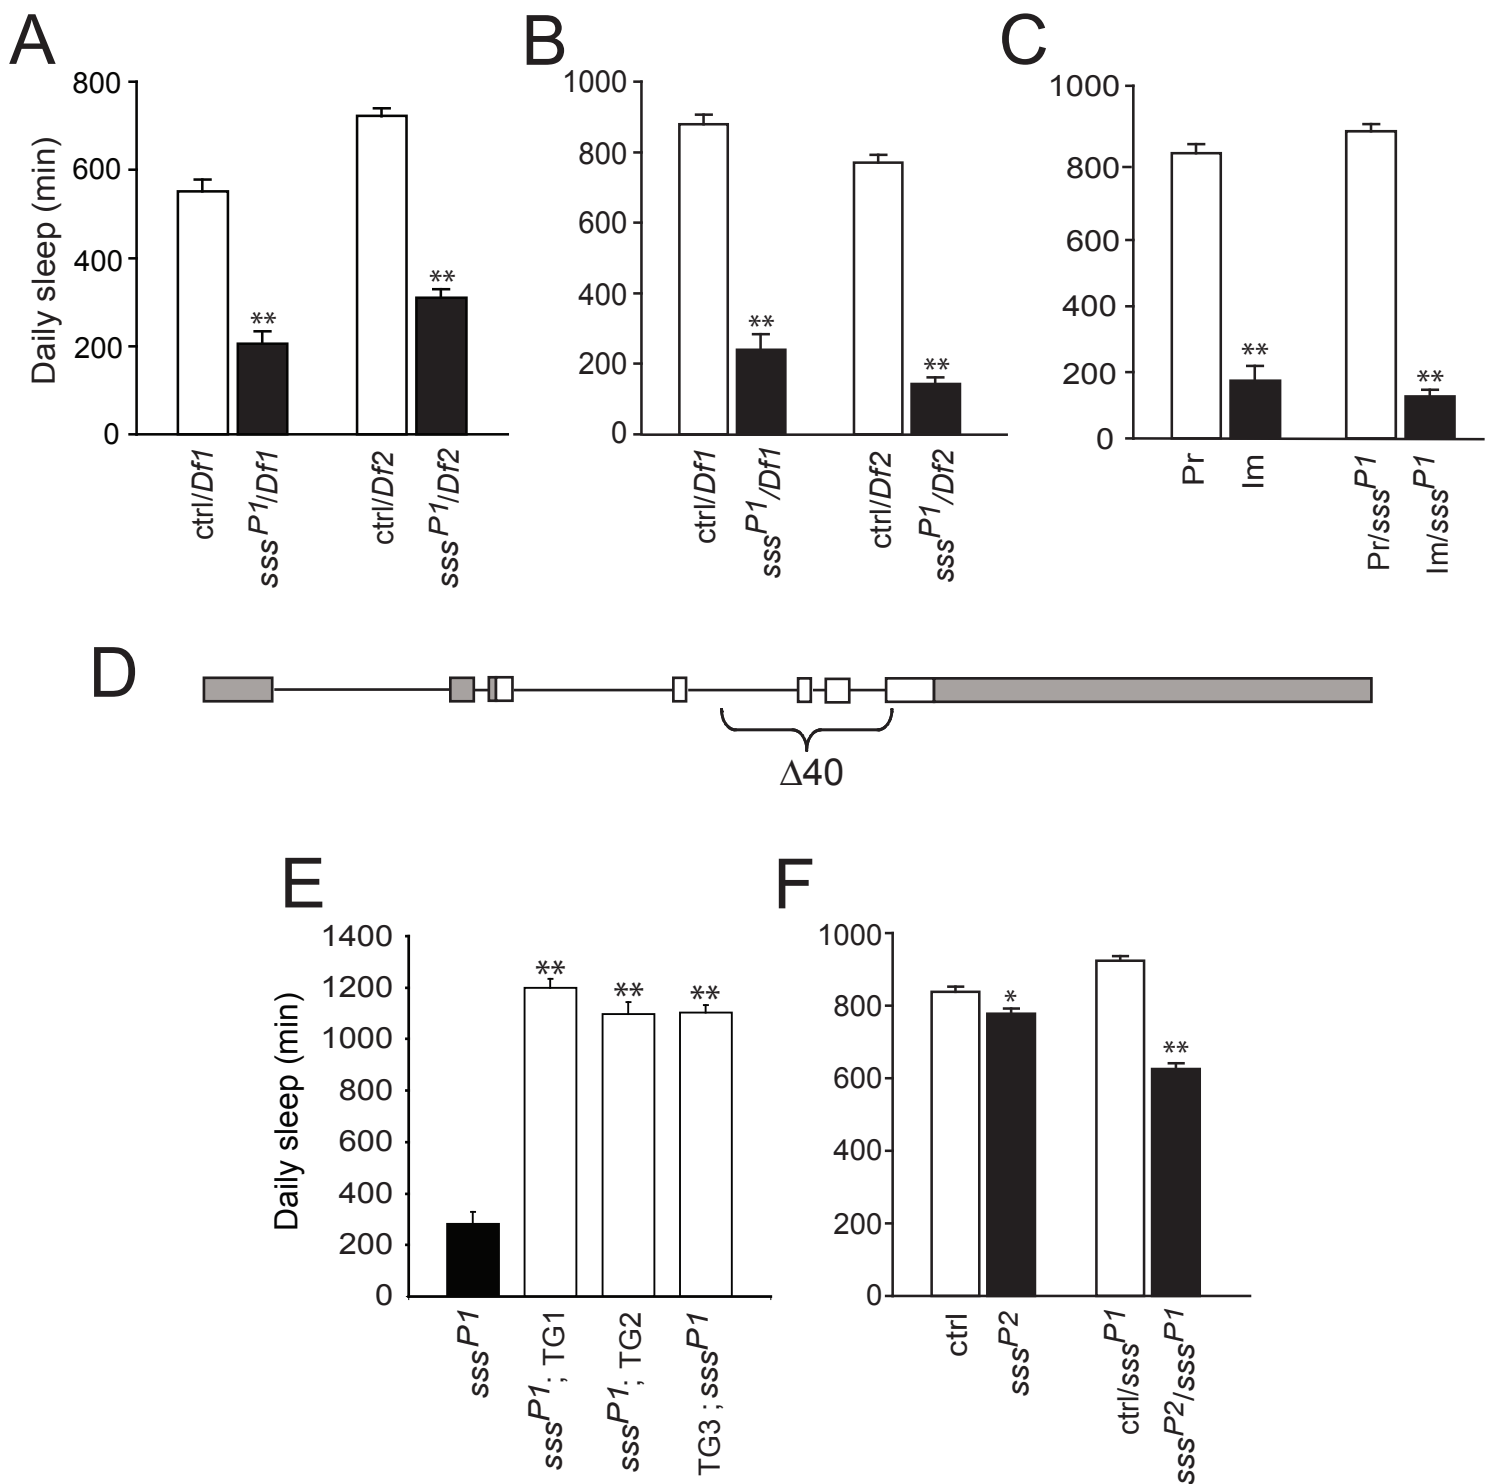

**fig. S2.** Genetic analysis of *sss* flies. **(A-B)** Deficiency mapping of the *sss* mutation. Daily sleep in minutes is shown for *Df(2R)ED2219 (Df1)* and *Df(2R)en-B (Df2)* flies crossed to either background control (ctrl) or *sss<sup>P1</sup>* flies. 21-65 female (A) and 18-42 male (B) flies were tested in each condition. **(C)** Daily sleep amount for precise excision (Pr; n=25), *sss<sup>Δ40</sup>* imprecise excision (Im, n=18), precise/*sss<sup>P1</sup>* (Pr/*sss<sup>P1</sup>*, n=29), and imprecise/*sss<sup>P1</sup>* (Im/*sss<sup>P1</sup>*, n=33) male flies. **(D)** Schematic of the *sss* genomic region and the imprecise excision allele,  $\Delta 40$ . The bracket indicates bases deleted in the  $\Delta 40$  allele. **(E)** Daily sleep amount for male *sss<sup>P1</sup>* mutant flies with (*sss<sup>P1</sup>*; TG1-3, n=16, 8, 15, respectively) or without (*sss<sup>P1</sup>*, n=13) a genomic *sss* transgene. TG1-3 refer to three independent transgenic insertions and either 1 or 2 copies of the transgene were present in the flies tested. **(F)** Daily sleep amount for *sss<sup>P2</sup>* (n=106) versus background control (ctrl, n=80), as well as ctrl/*sss<sup>P1</sup>* (n=79) versus *sss<sup>P2</sup>*/*sss<sup>P1</sup>* (n=112) male flies. \* $P < 0.05$ ; \*\* $P < 0.0001$ .

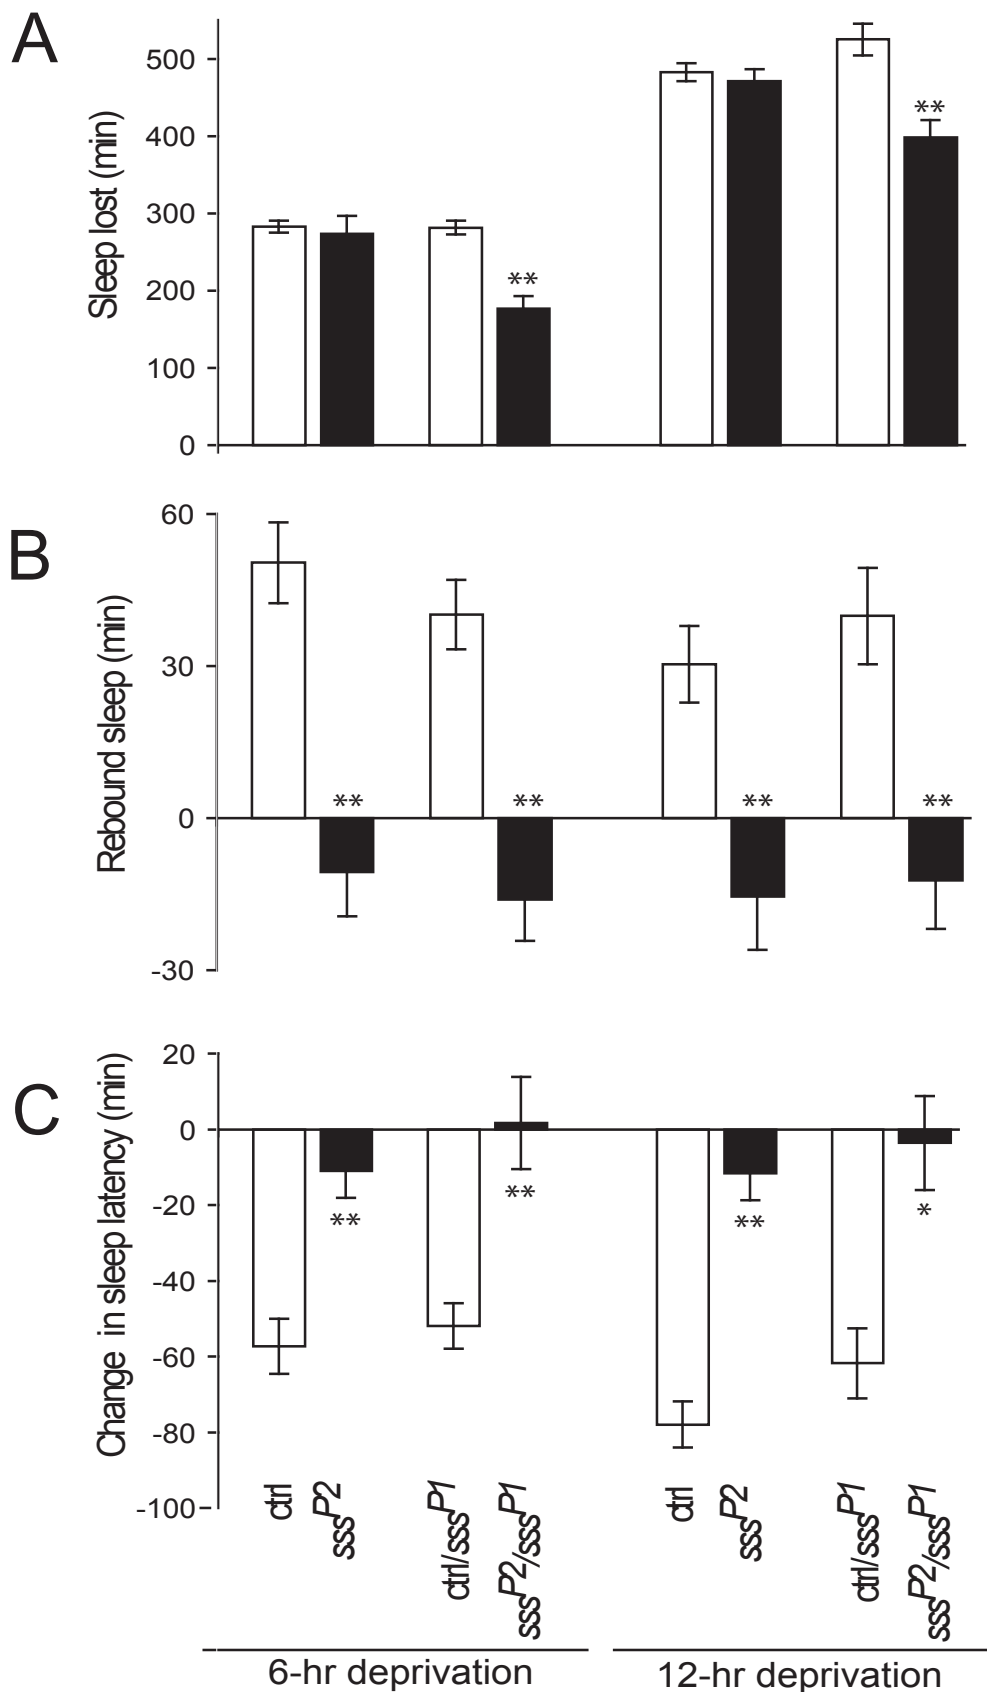

**fig. S3.** Reduced homeostatic response to sleep deprivation in male *sss* mutants. **(A)** Amount of sleep lost during 6 or 12 hours of deprivation at the end of the dark period for background control (ctrl), *sss<sup>P2</sup>*, ctrl/*sss<sup>P1</sup>*, and *sss<sup>P2</sup>/sss<sup>P1</sup>* flies. Data from 18-60 male flies are presented. **(B)** Amount of sleep gained during 6 hours of recovery following deprivation as in (A). **(C)** Change in sleep latency following deprivation, compared to undisturbed controls as in (A). \* $P < 0.05$ ; \*\* $P < 0.001$ .

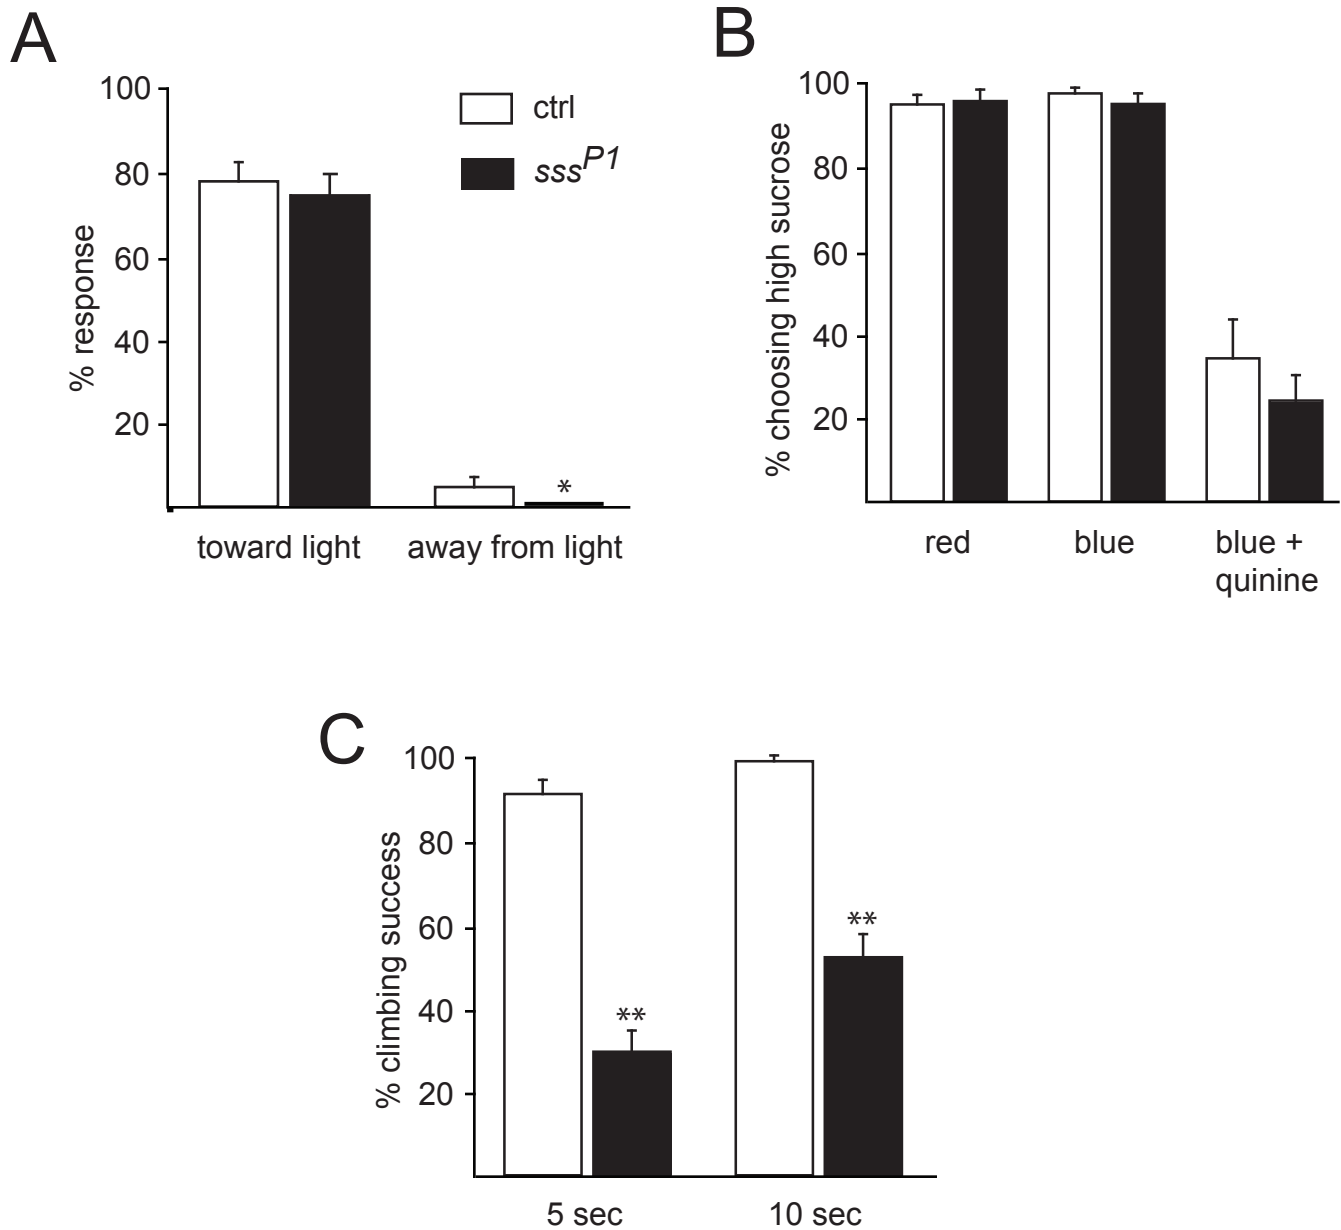

**fig. S4.** General behavioral assays for *sss* mutants. **(A)** Percent of control and *sss*<sup>P1</sup> flies that run toward a distal light source or away from a proximal light source is shown. 79-82 flies were tested in each condition. **(B)** Percent of control and *sss*<sup>P1</sup> flies that choose 5 mM over 1 mM sucrose is shown. Addition of food coloring (red or blue) or quinine to the 5 mM sucrose condition is denoted below the results of each of three experiments. No preference is observed for color of food. Control and mutant flies have an equivalent preference for 5 mM over 1 mM sucrose and an equivalent avoidance of 1 mM quinine in the presence of the higher concentration of sugar. 26-95 animals were used in each condition. **(C)** Percent of control and *sss*<sup>P1</sup> flies that climb 9 cm in either 5 or 10 seconds is shown. 74-83 animals were tested in each condition. In all three panels, white depicts control and black depicts *sss*<sup>P1</sup> animals. \**P* < 0.05; \*\**P* < 0.0001.

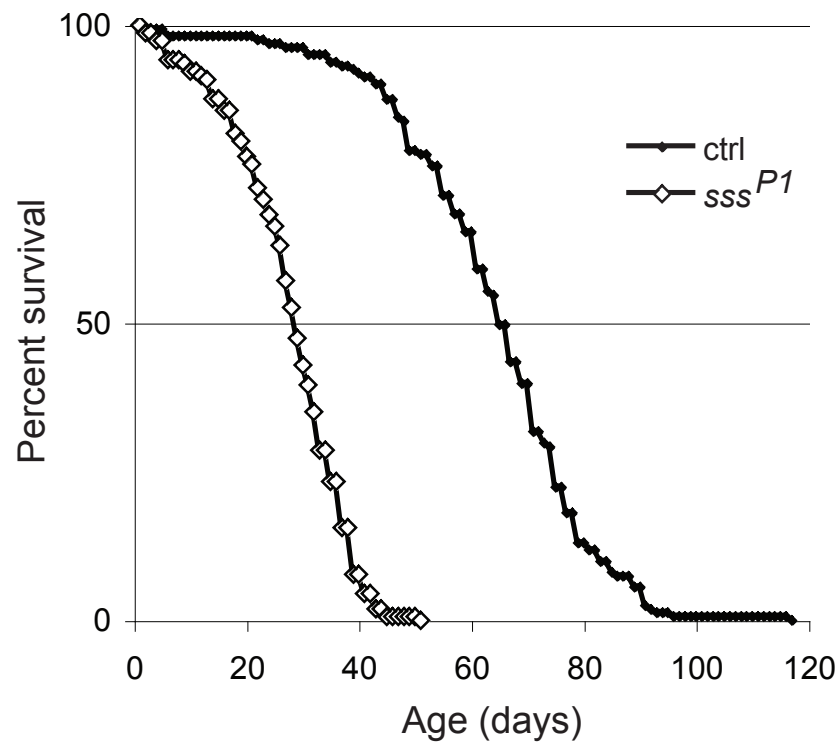

**Fig. S5.** Survivorship curves of background control (ctrl, closed diamonds) and *sss<sup>P1</sup>* (open diamonds) flies. Male *sss<sup>P1</sup>* flies (n=154) show a significantly shorter lifespan ( $P < 0.0001$ ) than male control flies (n=161).

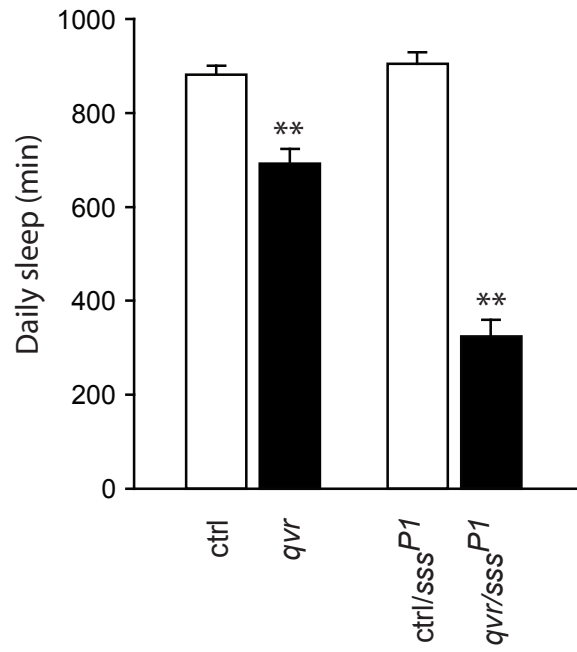

**fig. S6.** Daily sleep amount for *qvr* (n=32) versus background control (ctrl, n=29), as well as ctrl/ss<sup>P1</sup> (n=30) versus *qvr*/ss<sup>P1</sup> (n=31) male flies. \*\* $P < 0.0001$ .
